# Supplementary material for: SARS-CoV-2 mRNA vaccination elicits broad and potent Fc effector functions to VOCs in vulnerable populations
Source: PubMed Central journal article supplement (PMC9516864; doi:10.1101/2022.09.15.22280000), 2022-09-18
Supplement: NIHPP2022.09.15.22280000V1-supplement-1.pdf [file NIHPP2022.09.15.22280000V1-supplement-1.pdf]

**Supplemental Table 1. Fc detection and antigen reagents**

| Antigen                               | Source                                | Fc Detection | Source                   |
|---------------------------------------|---------------------------------------|--------------|--------------------------|
| SARS-CoV-2 S                          | Acro Biosystems<br>SPN-C82E9          | a- IgG       | Southern Biotech 2048-09 |
| SARS-CoV-2 S1                         | Acro Biosystems<br>S1N-C52H3          | a-IgG1       | Southern Biotech 9054-09 |
| SARS CoV-2 S2-P                       | Plasmid provided by<br>Jason McLellan | a-IgG2       | Southern Biotech 9070-09 |
| SARS CoV-2 S-6P                       | Plasmid provided by<br>Jason McLellan | a-IgG3       | Southern Biotech 9210-09 |
| SARS CoV-2 RBD                        | BEI Resources<br>NR-52366             | a-IgG4       | Southern Biotech 9200-09 |
| SARS CoV-2 S2                         | Immune Technology<br>IT-002-034p      | a-IgA        | Southern Biotech 2050-09 |
| SARS-CoV-2 S Alpha<br>(B.1.1.7)       | Sino Biological<br>40589-V08B6        | a-IgM        | Southern Biotech 9020-09 |
| SARS-CoV-2 S Beta<br>(B.1.351)        | Sino Biological<br>40589-V08B7        | FcyR2a       | Boesch, et. al, 2014     |
| SARS-CoV-2 S Gamma<br>(P.1)           | Sino Biological<br>40589-V08B8        | FcyR2b       | Boesch, et. al, 2014     |
| SARS-CoV-2 S Delta<br>(B.1.617.2)     | Sino Biological<br>40589-V08B12       | FcyR3a       | Boesch, et. al, 2014     |
| SARS-CoV-2 S Omicron<br>(B.1.1.529)   | Sino Biological<br>40589-V08H26       | FcyR3b       | Boesch, et. al, 2014     |
| SARS-CoV-2 RBD Alpha<br>(B.1.1.7)     | Sino Biological<br>40592-V08H82       |              |                          |
| SARS-CoV-2 RBD Beta<br>(B.1.351)      | Sino Biological<br>40592-V08H4        |              |                          |
| SARS-CoV-2 RBD Gamma<br>(P.1)         | Sino Biological<br>40592-V08H86       |              |                          |
| SARS-CoV-2 RBD Delta<br>(B.1.617.2)   | Sino Biological<br>40592-V49H-B       |              |                          |
| SARS-CoV-2 RBD Omicron<br>(B.1.1.529) | Sino Biological<br>40592-V08H121      |              |                          |
| SARS-CoV S                            | Sino Biological<br>40634-V08B         |              |                          |
| SARS-CoV S1                           | Sino Biological<br>40634-V08B         |              |                          |
| MERS S                                | Sino Biological<br>40069-V08B-B       |              |                          |
| MERS S1                               | Sino Biological<br>40069-V08B1        |              |                          |
| OC43 S                                | Sino Biological<br>40607-V08B         |              |                          |
| OC43 S-2P                             | Plasmid provided by<br>Jason McLellan |              |                          |

It is made available under a [CC-BY 4.0 International license](https://creativecommons.org/licenses/by/4.0/) .

|         |                               |  |  |
|---------|-------------------------------|--|--|
| OC43 S2 | Sino Biological<br>40069-V08B |  |  |
| 229E S  | Sino Biological<br>40605-V08B |  |  |
| 229E S1 | Sino Biological<br>40601-V08H |  |  |
| HKU1 S  | Sino Biological<br>40606-V08B |  |  |
| HKU1 S1 | Sino Biological<br>40602-V08H |  |  |
| NL63 S  | Sino Biological<br>40606-V08B |  |  |
| NL63 S1 | Sino Biological<br>40604-V08H |  |  |
